# Supplementary material for: Chirality induction and amplification in methylene blue H-aggregates viad- and l-phenylalanine pre-adsorbed on the tungsten oxide nanocolloid surface
Source: Royal Society of Chemistry journal article supplement (doi:10.1039/c2nj40415j), 2012-01-01
Supplement: c2nj40415j.doc [file c2nj40415j.doc]

Electronic Supplementary Information

Chirality induction and amplification in methylene blue H-aggregates *via* amino acids pre-adsorbed on the tungsten oxide nanocolloid surface

Kenta ADACHI 1*, Shohei TANAKA 1, Suzuko YAMAZAKI 1,

Hideaki TAKECHI2, Satoshi TSUKAHARA 2, Hitoshi WATARAI 3.

(1) Department of Environmental Science & Engineering, Graduate School of Science & Engineering, Yamaguchi University, Yamaguchi, 753-8512, Japan.

(2) Department of Chemistry, Graduate School of Science, Osaka University, Toyonaka, Osaka, 560-0043, Japan.

(3) Institute for NanoScience Design, Osaka University, Toyonaka, Osaka, 560-8531, Japan.

**Figure S1** [Upper part] Circular dichroism (CD) spectra of (a) l-Phe, (c) WO3, (e) MB/l-Phe binary, (g) MB/WO3 binary, (i) l-Phe/WO3 binary, and (k) reverse addition order MB/l-Phe/WO3 ternary aqueous solution. [Lower part] Adsorption spectra of (b) l-Phe, (d) WO3, (f) MB/l-Phe binary, (h) MB/WO3 binary, (j) l-Phe/WO3 binary, and (l) reverse addition order MB/l-Phe/WO3 ternary aqueous solution. Concentration: [MB] = 1.0×10-6 M, [Phe] = 1.0×10-4 M, [WO3] = 1.0×10-4 M, [NaCl] = 1.0×10-2 M, and pH 3.0 (HCl).
